# Supplementary material
Source: PubMed Central journal article supplement (PMC3666806)
Supplement: JCM.03285-12_zjm999092389so1.pdf [file JCM.03285-12_zjm999092389so1.pdf]

**Supplementary Table 1. Parasite counts by First Response™ (pLDH) results, for all samples (A) and pre-treatment samples (B).**

**A.**

| pLDH result, N(%)              | Pre-treatment parasite density<br>(parasites/μL) |                            |                  | Pre-treatment parasite density<br>(parasites/μL) |                          |                | Pre-treatment parasite density<br>(parasites/μL) |                      |              |
|--------------------------------|--------------------------------------------------|----------------------------|------------------|--------------------------------------------------|--------------------------|----------------|--------------------------------------------------|----------------------|--------------|
|                                | <i>P. knowlesi</i><br>(N=129)                    | Median (IQR)               | Range            | <i>P. falciparum</i><br>(N=121)                  | Median (IQR)             | Range          | <i>P. vivax</i><br>(N=43)                        | Median (IQR)         | Range        |
| <b>Negative</b>                | 34 (26)                                          | 2321 (375 – 9752)          | 65 - 58,421      | 11 (9)                                           | 1698 (444 – 5126)        | 234 - 25,308   | 2 (5)                                            | 2800 (1700 – 3900)   | 1700 - 3900  |
| <b>1+</b>                      | 34 (26)                                          | 2840 (1596 - 13,197)       | 32 - 123,590     | 35 (29)                                          | 6858 (3366 - 19,230)     | 221 - 119,370  | 4 (9)                                            | 3867 (1496 - 5126)   | 72 - 5439    |
| <b>2+</b>                      | 17 (13)                                          | 8646 (5550 - 31,862)       | 930 - 139,793    | 17 (14)                                          | 11,466 (7196 - 21,760)   | 625 - 56,897   | 5 (12)                                           | 1890 (925 - 16,608)  | 858 - 17,670 |
| <b>3+</b>                      | 17 (13)                                          | 14,288 (5522 - 24,052)     | 1980 - 61,778    | 24 (20)                                          | 9486 (2994 - 22,230)     | 16 - 81,062    | 7 (16)                                           | 4694 (2928 - 10,463) | 133 - 84,403 |
| <b>4+</b>                      | 24 (18)                                          | 202,963 (60,841 - 327,062) | 13,680 - 584,015 | 30 (25)                                          | 64,357 (19,034 - 97,365) | 5525 - 959,383 | 20 (47)                                          | 8052 (3884 - 15,483) | 460 - 45,844 |
| <b>Total positive*</b>         | 95 (74)                                          | 19,251 (4253 - 108,041)    | 32 - 584,015     | 110 (91)                                         | 14,660 (5611 - 52,451)   | 16 - 959,383   | 41 (95)                                          | 4938 (2920 - 12,927) | 72 - 84,403  |
| <b>Sensitivity, % (95% CI)</b> | <b>74 (65-80)</b>                                |                            |                  | <b>91 (84-95)</b>                                |                          |                | <b>95 (85-99)</b>                                |                      |              |

**B.**

| pLDH result, N(%)              | Pre-treatment parasite density<br>(parasites/μL) |                           |                  | Pre-treatment parasite density<br>(parasites/μL) |                          |                | Pre-treatment parasite density<br>(parasites/μL) |                      |               |
|--------------------------------|--------------------------------------------------|---------------------------|------------------|--------------------------------------------------|--------------------------|----------------|--------------------------------------------------|----------------------|---------------|
|                                | <i>P. knowlesi</i><br>(N=34)                     | Median (IQR)              | Range            | <i>P. falciparum</i><br>(N=42)                   | Median (IQR)             | Range          | <i>P. vivax</i><br>(N=12)                        | Median (IQR)         | Range         |
| <b>Negative</b>                | 4 (12)                                           | 301 (179 - 5699)          | 75 – 11,078      | 4 (10)                                           | 2307 (1545 - 3170)       | 1392 - 3425    | 0                                                |                      |               |
| <b>1+</b>                      | 9 (26)                                           | 1800 (1274 - 8537)        | 907 - 19,895     | 8 (19)                                           | 3251 (1418 - 5157)       | 431 - 10,626   | 1 (8)                                            | 72                   |               |
| <b>2+</b>                      | 6 (18)                                           | 5196 (1980 - 6450)        | 1574 - 14,056    | 5 (12)                                           | 10,500 (10,251 - 11,466) | 7196 - 14,880  | 1 (8)                                            | 858                  |               |
| <b>3+</b>                      | 7 (21)                                           | 5678 (4412 - 14,287)      | 3823 - 21,700    | 10 (24)                                          | 10,235 (3990 - 30,188)   | 16 - 81,062    | 4 (33)                                           | 6841 (3074 - 47,433) | 2928 - 84,403 |
| <b>4+</b>                      | 8 (24)                                           | 48,168 (22,889 - 288,528) | 13,680 - 584,015 | 14 (33)                                          | 64,357 (36,738 - 78,789) | 5525 - 135,435 | 4 (33)                                           | 6201 (3982 - 10,195) | 3025 - 12,927 |
| <b>Total positive*</b>         | 30 (88)                                          | 7493 (3823 - 19,895)      | 907 - 584,014    | 38 (90)                                          | 12,549 (5068 - 62,779)   | 16 - 135,435   | 12 (100)                                         | 4079 (2888 - 9,079)  | 72 - 84,403   |
| <b>Sensitivity, % (95% CI)</b> | <b>88 (73-95)</b>                                |                           |                  | <b>90 (78-96)</b>                                |                          |                | <b>100 (76-100)</b>                              |                      |               |

\* includes some results recorded only as “positive”

Supplementary Table 2. Parasite counts by ParaHIT™ (aldolase) results, for all samples (A) and pre-treatment samples (B).

A.

| Aldolase result                | <i>P. knowlesi</i><br>(N=96) | Pre-treatment parasite density (parasites/μL) |                   | <i>P. falciparum</i><br>(N=84) | Pre-treatment parasite density (parasites/μL) |                  | <i>P. vivax</i><br>(N=36) | Pre-treatment parasite density<br>(parasites/μL) |               |
|--------------------------------|------------------------------|-----------------------------------------------|-------------------|--------------------------------|-----------------------------------------------|------------------|---------------------------|--------------------------------------------------|---------------|
|                                |                              | Median (IQR)                                  | Range             |                                | Median (IQR)                                  | Range            |                           | Median (IQR)                                     | Range         |
| Negative                       | 74 (77)                      | 6556 (1755 - 25,876)                          | 32 - 584,015      | 47 (56)                        | 11,610 (5126 - 27,905)                        | 234 - 959,383    | 16 (44)                   | 4876 (2369 - 15,299)                             | 72 - 46,849   |
| 1+                             | 12 (13)                      | 28546 (11,155 - 77,395)                       | 4412 - 153,734    | 21 (25)                        | 11,373 (5068 - 32,267)                        | 16 - 97,365      | 15 (42)                   | 3220 (858 - 4938)                                | 133 - 16,608  |
| 2+                             | 5 (5)                        | 160,328 (30,393 - 304,454)                    | 24,052 - 327,062  | 7 (8)                          | 40,310 (17,444 - 81,062)                      | 444 - 502,475    | 2 (6)                     | 9895 (9548 - 10,243)                             | 9548 - 10,243 |
| 3+                             | 2 (2)                        | 295,474 (249,994 - 340,954)                   | 249,994 - 340,954 | 3 (4)                          | 3425 (3322 - 119,370)                         | 3322 - 119,370   | 0                         |                                                  |               |
| 4+                             | 0                            |                                               |                   | 2 (2)                          | 90,390 (19,034 - 161,748)                     | 19,034 - 161,748 | 0                         |                                                  |               |
| <b>Total positive*</b>         | 22 (23)                      | 50,794 (13,680 - 160,328)                     | 395 - 340,954     | 37 (44)                        | 17,444 (6380 - 62,779)                        | 16 - 502,475     | 20 (56)                   | 3973 (926 - 7579)                                | 133 - 16,608  |
| <b>Sensitivity, % (95% CI)</b> | <b>23 (16 - 32)</b>          |                                               |                   | <b>44 (34 - 55)</b>            |                                               |                  | <b>56 (40 - 70)</b>       |                                                  |               |

B.

| Aldolase result                | <i>P. knowlesi</i><br>(N=26) | Pre-treatment parasite density (parasites/μL) |                | <i>P. falciparum</i><br>(N=30) | Pre-treatment parasite density (parasites/μL) |                 | <i>P. vivax</i><br>(N=11) | Pre-treatment parasite density<br>(parasites/μL) |              |
|--------------------------------|------------------------------|-----------------------------------------------|----------------|--------------------------------|-----------------------------------------------|-----------------|---------------------------|--------------------------------------------------|--------------|
|                                |                              | Median (IQR)                                  | Range          |                                | Median (IQR)                                  | Range           |                           | Median (IQR)                                     | Range        |
| Negative                       | 19 (73)                      | 4833 (1574 - 14,056)                          | 75 - 584,015   | 15 (50)                        | 10,500 (3264 - 36,738)                        | 1328 - 78,789   | 3 (33)                    | 2848 (72 - 12,927)                               | 72 - 12,927  |
| 1+                             | 5 (19)                       | 13,680 (9112 - 29,023)                        | 4412 - 60,841  | 11 (37)                        | 17,263 (5068 - 69,708)                        | 16 - 97,365     | 7 (64)                    | 3220 (2928 - 7463)                               | 858 - 10,463 |
| 2+                             | 1 (4)                        | 327,062                                       |                | 2 (7)                          | 60,979 (40,895 - 81,062)                      | 40,895 - 81,062 | 0                         |                                                  |              |
| 3+                             | 1 (4)                        | 249,994                                       |                | 1 (3)                          | 3425                                          |                 | 0                         |                                                  |              |
| 4+                             | 0                            |                                               |                | 0                              |                                               |                 | 0                         |                                                  |              |
| <b>Total positive*</b>         | 7 (27)                       | 29,023 (9112 - 249,994)                       | 4412 - 327,062 | 15 (50)                        | 32,267 (5068 - 69,708)                        | 16 - 97,365     | 8 (73)                    | 4079 (2978 - 7579)                               | 858 - 10,463 |
| <b>Sensitivity, % (95% CI)</b> | <b>27 (14 - 46)</b>          |                                               |                | <b>50 (33 - 67)</b>            |                                               |                 | <b>73 (43 - 90)</b>       |                                                  |              |

\* includes some results recorded only as "positive"
